# Supplementary material for: Chronic occupational exposures to irritants and asthma in the CONSTANCES cohort
Source: HighWire-hosted journal article supplement (doi:10.1136/oemed-2023-109100), 2024-02-28
Supplement: oemed-2023-109100supp001_data_supplement.pdf [file oemed-2023-109100supp001_data_supplement.pdf]

## ONLINE SUPPLEMENT

**CHRONIC OCCUPATIONAL EXPOSURES TO IRRITANTS AND  
ASTHMA IN THE CONSTANCES COHORT**

Guillaume SIT<sup>a</sup>, Laurent ORSI<sup>a</sup>, Yuriko IWATSUBO<sup>b</sup>, Brigitte DANANCHE<sup>a</sup>, Florence ORSI<sup>a</sup>, Marcel GOLDBERG<sup>c,d</sup>, Bénédicte LEYNAERT<sup>a</sup>, Rachel NADIF<sup>a</sup>, Céline RIBET<sup>c,d</sup>, Nicolas ROCHE<sup>c</sup>, Yves ROQUELAURE<sup>f</sup>, Raphaëlle VARRASO<sup>a</sup>, Marie ZINS<sup>c,d</sup>, Corinne PILORGET<sup>b</sup>, Nicole LE MOUAL<sup>a</sup>, Oriane DUMAS<sup>a</sup>

- a. Université Paris-Saclay, UVSQ, Univ. Paris-Sud, Inserm, Équipe d'Épidémiologie respiratoire intégrative, CESP, 94807, Villejuif, France
- b. Santé publique France Direction Santé Environnement Travail, 94415 Saint-Maurice, France
- c. Université de Paris Cité, Université Paris-Saclay, UVSQ, Inserm, UMS 11, Cohortes Epidémiologiques en population, 94807, Villejuif, France.
- d. Faculty of Medicine, University of Paris, 75006 Paris, France
- e. APHP Centre-Université de Paris, Hôpital et Institut Cochin, Service de Pneumologie, 75014 Paris, France
- f. UNIV Angers, CHU Angers, Univ Rennes, Inserm, EHESP, Irset (Institut de recherche en santé, environnement et travail) UMR\_S1085, F-49000 Angers, France

**ETHICS STATEMENT**

The CONSTANCES cohort received ethical approval from the French National Data Protection Authority (authorisation no. 910486) and the Institutional Review Board of the National Institute for Medical Research (authorisation no. 01-011). All participants gave informed consent to participate.

Figure S1: Selection of study population

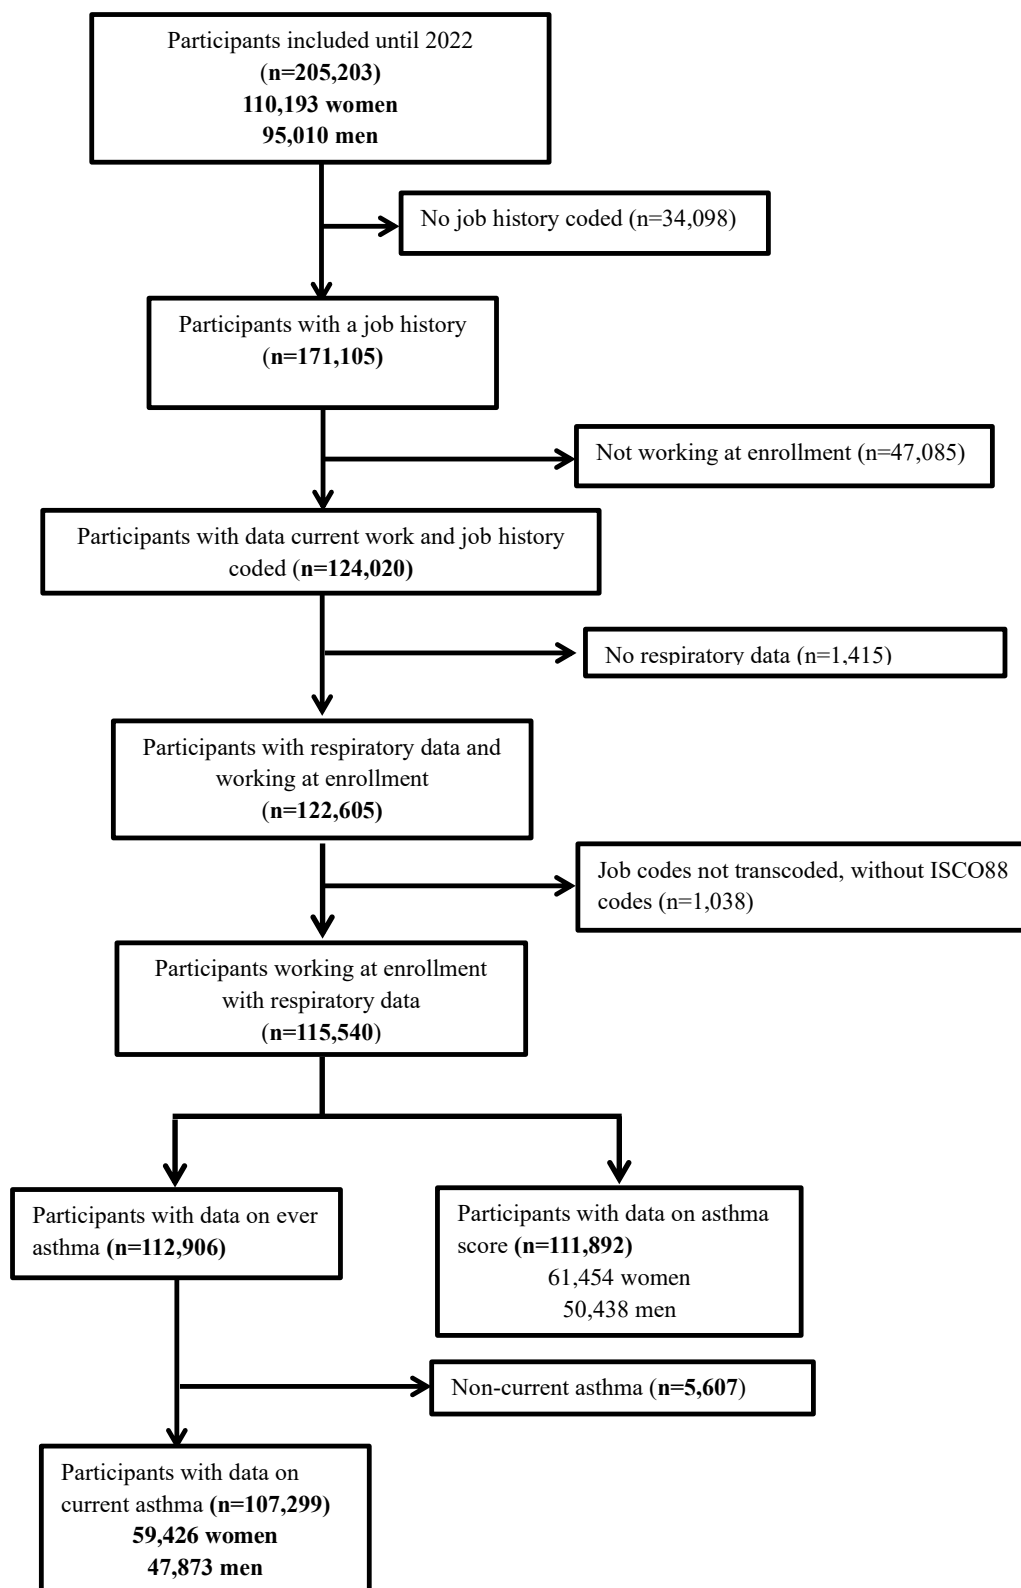

Table S1: List of individual agents classified in 3 large groups in the new occupational asthma-specific JEM (OAsJEM)

| Agents, n=30                      | HMW sensitizer | LMW Sensitizer | Irritant |
|-----------------------------------|----------------|----------------|----------|
| Animals                           | 1              |                |          |
| Fish/shellfish                    | 1              |                |          |
| Flour                             | 1              |                |          |
| Foods                             | 1              |                |          |
| Plant-related dusts               | 1              |                |          |
| House dust mites                  | 1              |                |          |
| Storage mites                     | 1              |                |          |
| Plant mites                       | 1              |                |          |
| Enzymes                           | 1              |                |          |
| Latex                             | 1              |                |          |
| Textiles                          | 1              |                | 1        |
| Moulds                            |                |                | 1        |
| Endotoxin                         |                |                | 1        |
| Drugs                             | 1              | 1              |          |
| High-level chemical disinfectants |                | 1              | 1        |
| Aliphatic amines                  |                | 1              | 1        |
| Isocyanates                       |                | 1              | 1        |
| Acrylates                         |                | 1              | 1        |
| Epoxy resins                      |                | 1              | 1        |
| Persulfates/henna                 |                | 1              | 1        |
| Wood                              |                | 1              | 1        |
| Metal                             |                | 1              | 1        |
| Metal working fluids              |                | 1              | 1        |
| Herbicides                        |                |                | 1        |
| Insecticides                      |                |                | 1        |
| Fungicides                        |                |                | 1        |
| Indoor cleaning                   |                |                | 1        |
| Bleach                            |                |                | 1        |
| Organic solvents                  |                |                | 1        |
| Exhaust fumes                     |                |                | 1        |

Table S2: Description of included and excluded populations

|                              | Included<br>n = 115,540 | Missing asthma<br>status<br>n = 1,415 | Missing BMI or<br>smoking status<br>n = 6,027 | Missing -job<br>transcoded<br>codes (ISCO88)<br>n = 1,038 |
|------------------------------|-------------------------|---------------------------------------|-----------------------------------------------|-----------------------------------------------------------|
| <b>Age, Mean, (sd)</b>       | 43.1 (10.7)             | 46.5 (13.7)*                          | 44.3 (10.8)*                                  | 43.0 (11.0)                                               |
| <b>Women</b>                 | 55.1                    | 51.7*                                 | 54.7                                          | 34.3*                                                     |
| <b>BMI</b>                   |                         | *                                     |                                               |                                                           |
| <25                          | 60.9                    | 46.3                                  | .                                             | 39.6                                                      |
| 25-29.9                      | 28.6                    | 32.5                                  | .                                             | 25.5                                                      |
| ≥30                          | 10.5                    | 21.2                                  | .                                             | 35.0                                                      |
| <b>Education</b>             |                         | *                                     | *                                             |                                                           |
| < High school                | 17.6                    | 44.6                                  | 21.2                                          | 42.5                                                      |
| High school                  | 14.9                    | 15.4                                  | 14.9                                          | 23.2                                                      |
| 2-3 years post-secondary     | 29.3                    | 18.5                                  | 26.9                                          | 23.0                                                      |
| 4-5 years post-secondary     | 38.0                    | 21.1                                  | 36.8                                          | 11.0                                                      |
| Other                        | 0.2                     | 0.4                                   | 0.2                                           | 0.3                                                       |
| <b>Smoking habits</b>        |                         | *                                     |                                               | *                                                         |
| Non smoker                   | 48.3                    | 52.0                                  | .                                             | 39.5                                                      |
| Former smoker                | 31.9                    | 32.0                                  | .                                             | 25.5                                                      |
| Current smoker               | 19.8                    | 16.0                                  | .                                             | 35.0                                                      |
| <b>Asthma symptoms score</b> |                         |                                       |                                               |                                                           |
| 0                            | 69.6                    | .                                     | 68.3                                          | 68.6                                                      |
| 1                            | 18.7                    | .                                     | 19.8                                          | 18.1                                                      |
| 2                            | 6.7                     | .                                     | 6.9                                           | 7.4                                                       |
| 3                            | 2.8                     | .                                     | 2.8                                           | 3.1                                                       |
| 4                            | 1.4                     | .                                     | 1.3                                           | 2.0                                                       |
| 5                            | 0.8                     | .                                     | 0.9                                           | 0.8                                                       |
| <b>Current asthma</b>        | 10.2                    | .                                     | 9.4                                           | 11.2                                                      |

Data are presented as % unless otherwise stated;

BMI = Body Mass Index;

\*p<0.05 for chi square test/Student test

Table S3: Associations between lifetime occupational exposure to irritants and current asthma or asthma symptom score, after excluding exposures also classified as potential LMW sensitizers

|                                                     | Current asthma   |                     |                    |                         |         | Asthma symptom score |                           |                    |                           |         |
|-----------------------------------------------------|------------------|---------------------|--------------------|-------------------------|---------|----------------------|---------------------------|--------------------|---------------------------|---------|
|                                                     | Men (n = 47,873) |                     | Women (n = 59,426) |                         | p inter | Men (n = 50,438)     |                           | Women (n = 61,454) |                           | p inter |
|                                                     | n                | Odds Ratio (95% CI) | n                  | Odds Ratio (95% CI)     |         | n                    | Mean Score Ratio (95% CI) | n                  | Mean Score Ratio (95% CI) |         |
| Ref                                                 | 26922            | 1                   | 37157              | 1                       |         | 28504                | 1                         | 43315              | 1                         |         |
| <b>Irritants <u>without</u><br/>LMW sensitizers</b> | 45985            |                     | 57549              |                         |         | 48451                |                           | 59483              |                           |         |
| Exposed                                             | 19063            | 0.96 [0.90-1.02]    | 20392              | <b>1.07 [1.01-1.13]</b> | <0.001  | 19947                | <b>1.12 [1.08-1.16]</b>   | 20996              | <b>1.10 [1.07-1.14]</b>   | 0.35    |
| Medium                                              | 12732            | 0.97 [0.91-1.04]    | 11149              | 1.02 [0.95-1.10]        | 0.31    | 13399                | <b>1.09 [1.05-1.13]</b>   | 11564              | 1.03 [0.99-1.07]          | 0.01    |
| High                                                | 6331             | 0.93 [0.85-1.02]    | 9243               | <b>1.14 [1.06-1.22]</b> | <0.001  | 6548                 | <b>1.16 [1.09-1.22]</b>   | 9432               | <b>1.19 [1.15-1.24]</b>   | 0.61    |

Table S4: Associations between lifetime occupational exposures and current asthma according to age of onset in men

|                         | Current asthma (n=47538)       |                                                  |                         |                                              |                         |
|-------------------------|--------------------------------|--------------------------------------------------|-------------------------|----------------------------------------------|-------------------------|
|                         | No asthma<br>(ref)<br>n=43,115 | Childhood onset asthma (≤16<br>years)<br>n=3,282 | Odds ratio (IC95%)      | Adult onset asthma (>16<br>years)<br>n=1,141 | Odds ratio<br>(IC95%)   |
| <b>Irritants</b>        | 42,736                         | 3,249                                            |                         | 1,122                                        |                         |
| Ref.                    | 24,232                         | 1,869                                            | 1                       | 649                                          | 1                       |
| Exposed                 | 18,504                         | 1,380                                            | 0.97 [0.90-1.04]        | 473                                          | 0.91 [0.81-1.03]        |
| Medium                  | 11,404                         | 881                                              | 0.99 [0.91-1.07]        | 300                                          | 0.95 [0.83-1.09]        |
| High                    | 7,100                          | 499                                              | 0.94 [0.85-1.04]        | 173                                          | 0.85 [0.71-1.00]        |
| <b>DCPs</b>             | 30,352                         | 2,410                                            |                         | 824                                          |                         |
| Ref.                    | 24,232                         | 1,869                                            | 1                       | 649                                          | 1                       |
| Exposed                 | 6,120                          | 541                                              | <b>1.09 [0.99-1.21]</b> | 175                                          | 1.03 [0.87-1.22]        |
| Medium                  | 3,860                          | 363                                              | <b>1.13 [1.00-1.27]</b> | 113                                          | 1.08 [0.88-1.32]        |
| High                    | 2,260                          | 178                                              | 1.03 [0.88-1.21]        | 62                                           | 0.96 [0.73-1.25]        |
| <b>Organic solvents</b> | 34,640                         | 2,587                                            |                         | 915                                          |                         |
| Ref.                    | 24,232                         | 1,869                                            | 1                       | 649                                          | 1                       |
| Exposed                 | 10,408                         | 718                                              | 0.93 [0.85-1.02]        | 266                                          | 0.90 [0.78-1.05]        |
| Medium                  | 9,654                          | 663                                              | 0.93 [0.84-1.02]        | 250                                          | 0.92 [0.79-1.06]        |
| High                    | 754                            | 55                                               | 1.00 [0.75-1.32]        | 16                                           | 0.74 [0.45-1.22]        |
| <b>HMW Sensitizers</b>  | 29,759                         | 2,363                                            |                         | 812                                          |                         |
| Ref.                    | 24,232                         | 1,869                                            | 1                       | 649                                          | 1                       |
| Exposed                 | 5,527                          | 494                                              | <b>1.11 [1.00-1.23]</b> | 163                                          | 1.07 [0.90-1.27]        |
| Medium                  | 3,453                          | 318                                              | <b>1.13 [0.99-1.28]</b> | 87                                           | 0.92 [0.73-1.15]        |
| High                    | 2,074                          | 176                                              | 1.09 [0.92-1.28]        | 76                                           | <b>1.32 [1.04-1.69]</b> |
| <b>LMW Sensitizers</b>  | 35,435                         | 2,653                                            |                         | 956                                          |                         |
| Ref.                    | 24,232                         | 1,869                                            | 1                       | 649                                          | 1                       |
| Exposed                 | 11,203                         | 784                                              | 0.94 [0.86-1.03]        | 307                                          | 0.97 [0.84-1.11]        |
| Medium                  | 8,464                          | 598                                              | 0.94 [0.85-1.03]        | 229                                          | 0.96 [0.82-1.12]        |
| High                    | 2,739                          | 186                                              | 0.94 [0.80-1.10]        | 78                                           | 0.98 [0.77-1.25]        |

Logistic regressions adjusted for age, BMI and smoking status  
n=335 participant with missing age of asthma onset

Table S5: Associations between lifetime occupational exposures and current asthma according to age of onset in women

|                         | Current asthma (n=47,538) |                                       |                       |                                   |                         |
|-------------------------|---------------------------|---------------------------------------|-----------------------|-----------------------------------|-------------------------|
|                         | No asthma<br>(réf)        | Childhood onset asthma<br>(≤16 years) |                       | Adult onset asthma (>16<br>years) |                         |
|                         | n=53,243                  | n=3,296                               | Odds ratio<br>(IC95%) | n=2,292                           | Odds ratio<br>(IC95%)   |
| <b>Irritants</b>        | 52,854                    | 3,276                                 |                       | 2,281                             |                         |
| Ref.                    | 33,435                    | 2,000                                 | 1                     | 1,374                             | 1                       |
| Exposed                 | 19,419                    | 1,276                                 | 1.01 [0.94-1.09]      | 907                               | <b>1.08 [0.99-1.17]</b> |
| Medium                  | 11,205                    | 723                                   | 0.98 [0.90-1.07]      | 472                               | 1.01 [0.91-1.13]        |
| High                    | 8,214                     | 553                                   | 1.06 [0.96-1.17]      | 435                               | <b>1.16 [1.04-1.30]</b> |
| <b>DCPs</b>             | 49,594                    | 3,061                                 |                       | 2,145                             |                         |
| Ref.                    | 33,435                    | 2,000                                 | 1                     | 1,374                             | 1                       |
| Exposed                 | 16,159                    | 1,061                                 | 1.01 [0.93-1.09]      | 771                               | <b>1.09 [1.00-1.20]</b> |
| Medium                  | 9,122                     | 575                                   | 0.94 [0.85-1.04]      | 387                               | 1.02 [0.91-1.15]        |
| High                    | 7,037                     | 486                                   | 1.10 [0.99-1.22]      | 384                               | <b>1.18 [1.05-1.33]</b> |
| <b>Organic solvents</b> | 40,790                    | 2,478                                 |                       | 1,718                             |                         |
| Ref.                    | 33,435                    | 2,000                                 | 1                     | 1,374                             | 1                       |
| Exposed                 | 7,355                     | 478                                   | 1.02 [0.92-1.13]      | 344                               | 1.05 [0.93-1.19]        |
| Medium                  | 6,402                     | 428                                   | 1.06 [0.95-1.18]      | 307                               | 1.08 [0.95-1.22]        |
| High                    | 953                       | 50                                    | 0.79 [0.59-1.05]      | 37                                | 0.88 [0.63-1.24]        |
| <b>HMW Sensitizers</b>  | 45,923                    | 2,822                                 |                       | 1,943                             |                         |
| Ref.                    | 33,435                    | 2,000                                 | 1                     | 1,374                             | 1                       |
| Exposed                 | 12,488                    | 822                                   | 1.02 [0.94-1.11]      | 569                               | 1.06 [0.96-1.17]        |
| Medium                  | 5,794                     | 382                                   | 0.96 [0.86-1.08]      | 251                               | 1.02 [0.89-1.18]        |
| High                    | 6,694                     | 440                                   | 1.07 [0.96-1.20]      | 318                               | 1.08 [0.96-1.23]        |
| <b>LMW Sensitizers</b>  | 45,752                    | 2,748                                 |                       | 1,950                             |                         |
| Ref.                    | 33,435                    | 2000                                  | 1                     | 1,374                             | 1                       |
| Exposed                 | 12,317                    | 748                                   | 0.96 [0.88-1.05]      | 576                               | 1.08 [0.98-1.19]        |
| Medium                  | 11,010                    | 667                                   | 0.97 [0.89-1.06]      | 518                               | 1.08 [0.98-1.20]        |
| High                    | 1307                      | 81                                    | 0.89 [0.70-1.12]      | 58                                | 1.04 [0.79-1.36]        |

Logistic regressions adjusted for age, BMI and smoking status  
n=595 participant with missing age of asthma onset

Table S6: Associations between current occupational exposure and current asthma or asthma symptom score

|                         | Current Asthma   |                         |                    |                         |         | Asthma symptom score |                           |                    |                           |         |
|-------------------------|------------------|-------------------------|--------------------|-------------------------|---------|----------------------|---------------------------|--------------------|---------------------------|---------|
|                         | Men (n = 47,873) |                         | Women (n = 59,426) |                         | p Inter | Men (n = 50,438)     |                           | Women (n = 61,454) |                           | p Inter |
|                         | n                | Odds Ratio (95% CI)     | n                  | Odds Ratio (95% CI)     |         | N                    | Mean Score Ratio (95% CI) | n                  | Mean Score Ratio (95% CI) |         |
| Ref                     | 34,863           | 1                       | 43,996             | 1                       |         | 36,863               | 1                         | 45,550             | 1                         |         |
| <b>Irritants</b>        | 47,310           |                         | 58,564             |                         |         | 49,846               |                           | 55,589             |                           |         |
| Exposed                 | 12,447           | <b>0.93 [0.87-1.00]</b> | 14,568             | 0.98 [0.92-1.04]        | 0.13    | 12,943               | <b>1.07 [1.03-1.12]</b>   | 15,004             | 1.01 [0.97-1.04]          | 0.001   |
| Medium                  | 8,298            | 0.94 [0.87-1.02]        | 9,173              | 0.96 [0.89-1.04]        | 0.48    | 8,701                | <b>1.06 [1.02-1.11]</b>   | 9,530              | <b>0.92 [0.89-0.97]</b>   | <0.001  |
| High                    | 4,149            | 0.90 [0.81-1.01]        | 5,395              | 1.00 [0.91-1.10]        | 0.07    | 4,282                | <b>1.10 [1.04-1.17]</b>   | 5,474              | <b>1.14 [1.09-1.20]</b>   | 0.39    |
| <b>DCPs</b>             | 38,538           |                         | 56,148             |                         |         | 40,701               |                           | 58,075             |                           |         |
| Exposed                 | 3,675            | 1.08 [0.97-1.20]        | 12,182             | 0.98 [0.92-1.05]        | 0.27    | 3,838                | <b>1.11 [1.03-1.17]</b>   | 12,525             | 1.02 [0.98-1.05]          | 0.02    |
| Medium                  | 2,315            | <b>1.13 [0.99-1.29]</b> | 7,357              | 0.96 [0.89-1.04]        | 0.04    | 2,434                | <b>1.08 [1.00-1.17]</b>   | 7,646              | <b>0.93 [0.89-0.97]</b>   | <0.001  |
| High                    | 1,360            | 0.99 [0.83-1.19]        | 4,825              | 1.02 [0.93-1.12]        | 0.17    | 1,404                | <b>1.14 [1.03-1.26]</b>   | 4,879              | <b>1.16 [1.10-1.22]</b>   | 0.80    |
| <b>Organic solvents</b> | 41,196           |                         | 48,012             |                         |         | 43,457               |                           | 49,642             |                           |         |
| Exposed                 | 6,333            | <b>0.89 [0.81-0.97]</b> | 8,150              | 0.93 [0.84-1.04]        | 0.31    | 6,594                | <b>1.05 [1.00-1.11]</b>   | 4,092              | <b>1.05 [1.00-1.12]</b>   | 0.93    |
| Medium                  | 6,079            | <b>0.89 [0.81-0.97]</b> | 3,910              | 0.96 [0.86-1.08]        | 0.11    | 6,344                | 1.05 [0.99-1.10]          | 3,694              | <b>1.06 [1.00-1.13]</b>   | 0.79    |
| High                    | 254              | 0.91 [0.60-1.40]        | 379                | <b>0.68 [0.47-0.98]</b> | 0.23    | 250                  | 1.20 [0.95-1.50]          | 398                | 0.98 [0.83-1.17]          | 0.14    |
| <b>HMW Sensitizers</b>  | 38,174           |                         | 53,633             |                         |         | 40,339               |                           |                    |                           |         |
| Exposed                 | 3,311            | <b>1.15 [1.03-1.29]</b> | 9,637              | 0.94 [0.87-1.01]        | 0.004   | 3,476                | <b>1.06 [1.00-1.14]</b>   | 10,017             | <b>0.94 [0.91-0.98]</b>   | 0.002   |
| Medium                  | 2,151            | <b>1.17 [1.02-1.33]</b> | 4,500              | <b>0.88 [0.79-0.98]</b> | 0.04    | 2,259                | 1.07 [0.99-1.16]          | 4,692              | <b>0.93 [0.88-0.99]</b>   | 0.004   |
| High                    | 1,160            | 1.13 [0.94-1.36]        | 5,137              | 0.99 [0.90-1.09]        | 0.94    | 1,217                | 1.06 [0.95-1.18]          | 5,325              | 0.96 [0.91-1.01]          | 0.10    |
| <b>LMW Sensitizers</b>  | 41,551           |                         | 53,110             |                         |         | 43,836               |                           | 55,064             |                           |         |
| Exposed                 | 6,688            | <b>0.91 [0.84-1.00]</b> | 9,174              | 0.93 [0.87-1.01]        | 0.48    | 6,973                | <b>1.05 [1.00-1.10]</b>   | 9,514              | <b>0.95 [0.91-0.99]</b>   | 0.002   |
| Medium                  | 5,468            | <b>0.90 [0.82-0.99]</b> | 8,491              | 0.95 [0.88-1.02]        | 0.08    | 5,717                | 1.02 [0.97-1.08]          | 8,798              | <b>0.96 [0.92-1.00]</b>   | 0.04    |
| High                    | 1,220            | 0.97 [0.80-1.18]        | 683                | <b>0.77 [0.59-1.00]</b> | 0.14    | 1,256                | <b>1.15 [1.03-1.28]</b>   | 716                | <b>0.88 [0.77-1.00]</b>   | 0.002   |

Logistic regressions and binomial negative regressions adjusted for age, BMI and smoking habits
